# Supplementary material for: Application of a geospatial query tool to characterize retail food environment and examine associations with dietary quality: evidence from three Chilean cities from the SALURBAL project
Source: Research Square preprint supplement (doi:10.21203/rs.3.rs-3962222/v1), 2024-02-29
Supplement: Supplementary file 2 [file 1ff04ab9e53941aa5df0a54f.docx]

## Additional file 4. Median Odds Ratios to show the between unit variation of non-daily fruit and vegetable consumption (< 7 days a week), city-level (3 cities combined) and neighbourhood-level, Chile 2017 (n 1,275).

|  |  | **Null model with random intercepts at** | | | |
| --- | --- | --- | --- | --- | --- |
|  |  | Neighborhood-  level | Neighborhood-  and city-level |  | **Model 3** |
| **Food establishments density per area (establishments/km^2)** | | Median odds ratio b | | | |
|  |  |  |  |  |  |
| Total a |  | 1.35 | 1.33 |  | 1.32 |
|  |  |  | 1.15 |  |  |
| Most healthy | Fruit and vegetable stores |  |  |  | 1.32 |
|  | Fresh food retail |  |  |  | 1.33 |
| Mixed | Small food retail |  |  |  | 1.31 |
|  | Supermarkets chains |  |  |  | 1.34 |
|  | Ready-for-consumption food retail |  |  |  | 1.31 |
| Less healthy | Candy and ice cream shops |  |  |  | 1.34 |
|  | Chain convenience stores |  |  |  | 1.34 |
|  | Fast-food chains |  |  |  | 1.34 |

a The row for ‘total’ includes all classifiable establishments N 46,950 + unclassifiable establishments N 1,450.

b If the median odds ratio is equal to 1, then there is no residual variation in the probability of having non-daily FV consumption. If the MOR is equal to 1.32, then (in the median case), the residual heterogeneity between-neighbourhoods increases the individual odds of having the outcome by 1.32 (when randomly picking out 2 people in different neighbourhoods). It can roughly be interpreted as 32% of the variability in the non-daily FV consumption is between neighbourhoods within cities.
